# Supplementary material for: Synthesis of novel Au@Void@Nb2O5 core–shell nanocomposites with enhanced photocatalytic activity
Source: Royal Society of Chemistry journal article supplement (doi:10.1039/c7dt04582d), 2018-01-01
Supplement: c7dt04582d1.pdf [file c7dt04582d1.pdf]

## Supporting information

### Synthesis of novel Au@Void@Nb<sub>2</sub>O<sub>5</sub> core-shell nanocomposites with enhanced photocatalytic activity

Jiaquan Bai,<sup>‡</sup> Jiao Xue,<sup>‡</sup> Runwei Wang,<sup>\*</sup> Zongtao Zhang and Shilun Qiu

College of Chemistry and State Key Laboratory of Inorganic Synthesis and Preparative Chemistry

Jilin University, Changchun, 130012, People's Republic of China. E-mail: rwwang@jlu.edu.cn

<sup>‡</sup> These authors contributed equally to this work.

#### The preparation of Au@Nb<sub>2</sub>O<sub>5</sub>-300 °C:

The as-prepared Au nanoparticles (5 mL) dissolved with a mixed solution of 0.1 g hydroxypropyl cellulose (HPC), 20 mL ethanol and 0.15 mL deionized water was stirring for 1 h. Then niobium (V) ethanol (0.6 mL) dissolved in 5 mL ethanol was injected into the mixed solution slowly within 20 min, followed by refluxing at 90 °C for 100 min. The precipitate formed was isolated by centrifugation and washed by absolute ethanol. The above coating procedure was repeated again to increase the thickness of the Nb<sub>2</sub>O<sub>5</sub> shell. The obtained powder was dried in vacuum oven for 4 h and then calcined in air at 300 °C for 2h.

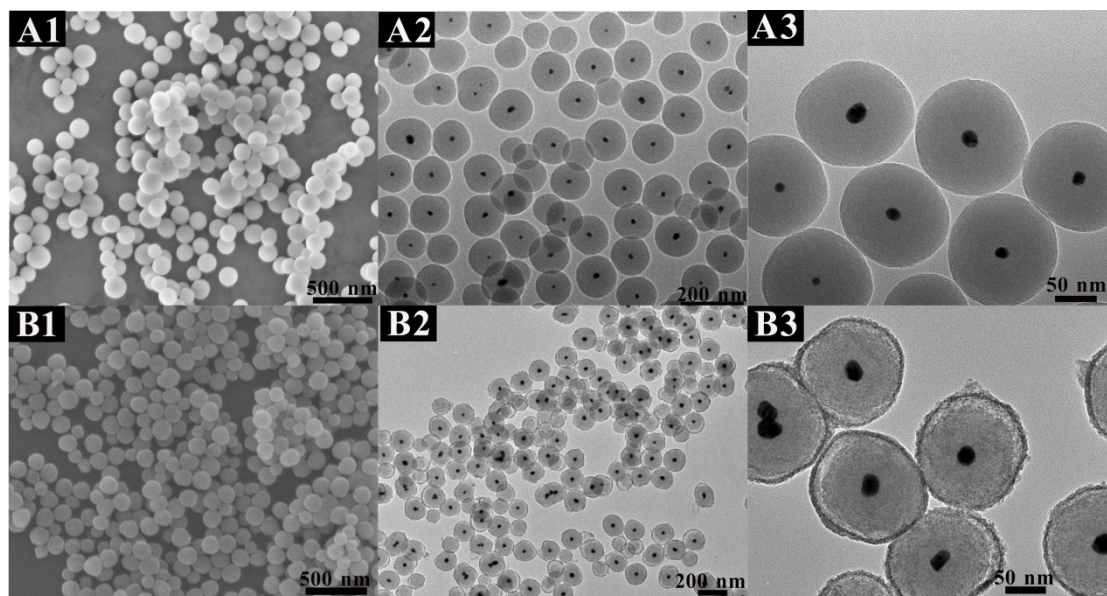

Fig. S1. A1, A2 and A3 are the SEM, TEM, HTEM images of the sample Au@SiO<sub>2</sub>; B1, B2 and B3 are the SEM, TEM, HTEM images of Au@Void@Nb<sub>2</sub>O<sub>5</sub>-2 (etching at base solution for 1.5 h and then being calcined at 300 °C for 2 h).

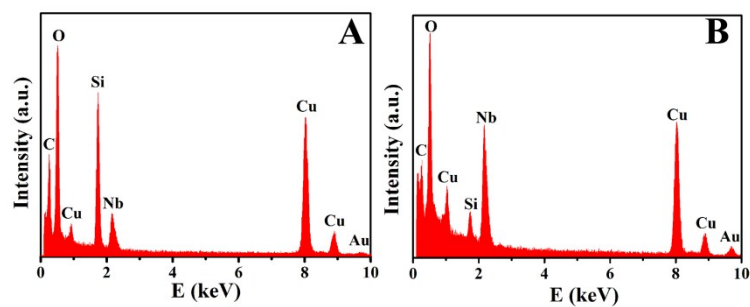

Fig. S2. A: EDX spectra of Au@SiO<sub>2</sub>@Nb<sub>2</sub>O<sub>5</sub>-2-300 °C; and B: Au@Void@Nb<sub>2</sub>O<sub>5</sub>Nb<sub>2</sub>O<sub>5</sub>-2-300 °C respectively.

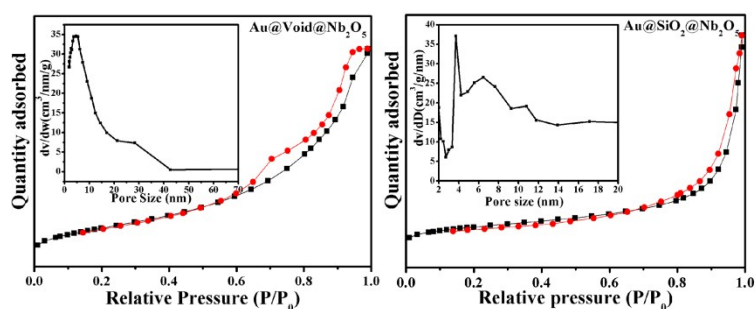

Fig. S3 N<sub>2</sub> adsorption and desorption isotherms of the Au@Void@Nb<sub>2</sub>O<sub>5</sub>-2(left) and Au@SiO<sub>2</sub>@Nb<sub>2</sub>O<sub>5</sub>-2(right) nanospheres at calcination temperature of 300 °C (insert is the plot of pore size distribution).

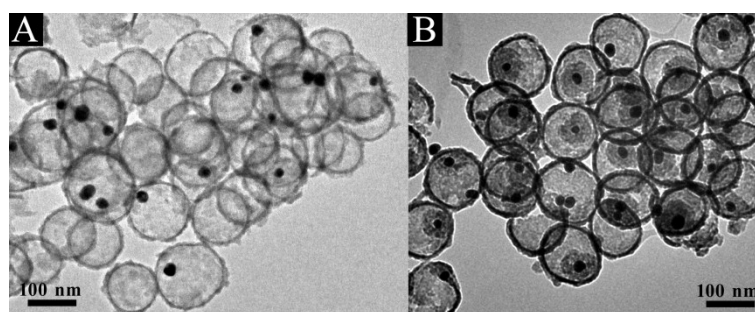

Fig. S4 TEM images of Au@Void@Nb<sub>2</sub>O<sub>5</sub> catalysts of different thicknesses and Au loading amounts.(A): 5.73% Au with 1 time Nb<sub>2</sub>O<sub>5</sub> coating(Au@Void@Nb<sub>2</sub>O<sub>5</sub>-1),(B):1.71% Au with 3 times Nb<sub>2</sub>O<sub>5</sub> coating(Au@Void@Nb<sub>2</sub>O<sub>5</sub>-3). All the samples calcined at 300 °C.

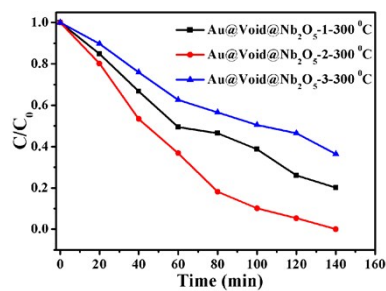

Fig. S5 Comparison of the photocatalytic efficiency over the various samples with different Au loading amounts (5.73%, 2.68%, 1.71% corresponding to the sample Au@Void@Nb<sub>2</sub>O<sub>5</sub>-1-300 °C, Au@Void@Nb<sub>2</sub>O<sub>5</sub>-2-300 °C, Au@Void@Nb<sub>2</sub>O<sub>5</sub>-3-300 °C) by photodegradation of aqueous Rh B solution.

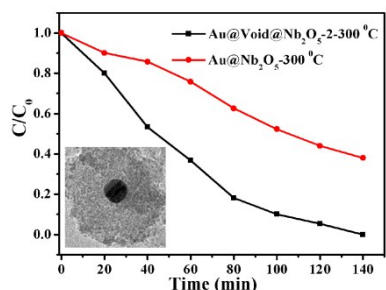

Fig. S6 The comparison of the photocatalytic performance of the two catalysts Au@Void@Nb<sub>2</sub>O<sub>5</sub>-2-300 °C and Au@Nb<sub>2</sub>O<sub>5</sub>-300 °C by photodegradation of aqueous Rh B solution under visible light irradiation, insert is the HTEM images of the Au@Nb<sub>2</sub>O<sub>5</sub>.

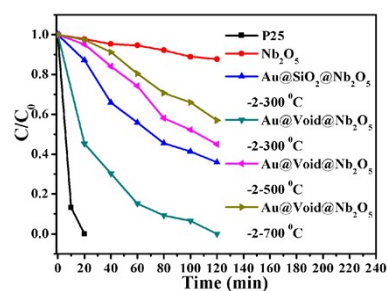

Fig. S7 Photocatalytic activity of various catalysts toward degradation of aqueous RhB solution under UV light irradiation.

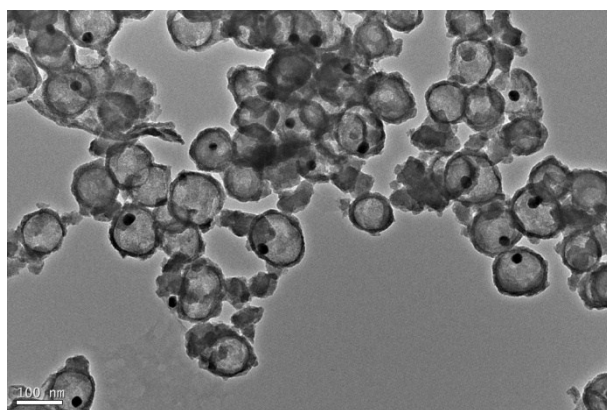

Fig. S8 TEM images of Au@Void@Nb<sub>2</sub>O<sub>5</sub>-2-300 °C catalysts after 5 cycles of photodegradation of aqueous Rh B solution under visible light irradiation.
